# Supplementary material for: Origin of the Residual Linewidth Under FSLG-Based Homonuclear Decoupling in MAS Solid-State NMR
Source: Copernicus journal article supplement (doi:10.5194/mr-2019-5), 2019-12-20
Supplement: Supplementary file 1 [file mr-2019-5-supplement.pdf]

## Supporting Information

### **Elucidation of the Residual Linewidth under Homonuclear FSLG-based Decoupling in MAS solid-state NMR**

5 Johannes Hellwagner<sup>1</sup>, Liam Grunwald<sup>1</sup>, Manuel Ochsner<sup>1</sup>, Daniel Zindel<sup>1</sup>, Beat H. Meier<sup>1</sup>, Matthias Ernst<sup>1</sup>

<sup>1</sup>Physical Chemistry, ETH Zürich, Zürich, 8093, Switzerland

*Correspondence to:* Matthias Ernst ([maer@ethz.ch](mailto:maer@ethz.ch)), Beat H. Meier ([beme@ethz.ch](mailto:beme@ethz.ch))

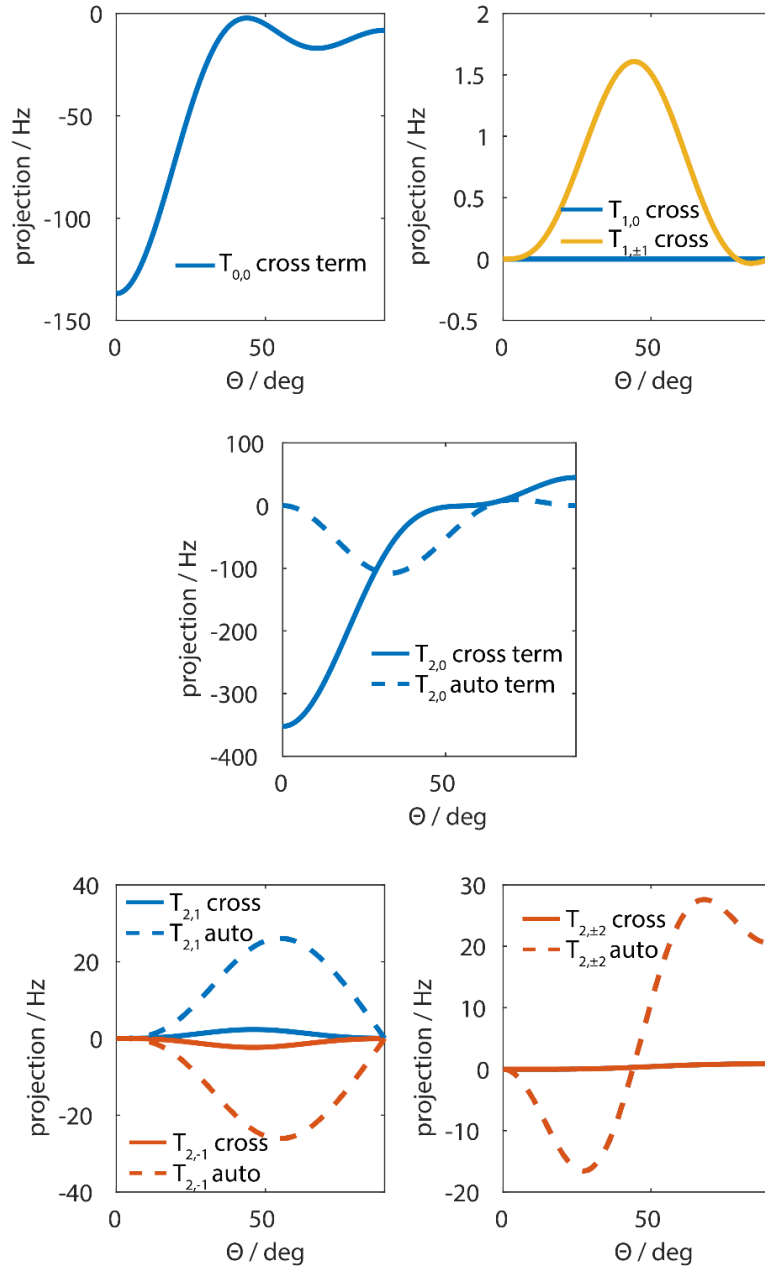

10 Figure S1: Projection of the magnitude of the third-order two spin tensors of spin 1 and 2 ( $T_{l,m}^{(1,2)}$ ) resulting after FSLG-irradiation assuming  
two homonuclear dipolar coupling. The simulation parameters for the powder orientations and the MAS to modulation frequency ratio are  
the same as shown in Figure 2 in the main text. The remaining auto-terms which scale only with the dipolar coupling between spin 1 and 2  
vanish either around  $60^\circ$  for the  $T_{2,0}$  and around  $40^\circ$  for the  $T_{2,\pm 2}$  term. Third-order cross-terms are shown in dashed lines which are a result  
of cross terms between the dipolar coupling  $\delta_{1,2}$  and  $\delta_{1,3}$ . These terms scale either with  $\delta_{1,2}\delta_{1,3}^2$  or  $\delta_{1,2}^2\delta_{1,3}$  but it can be seen in their spatial  
15 dependence that they are minimized around the magic-angle except the  $T_{0,0}$  term.

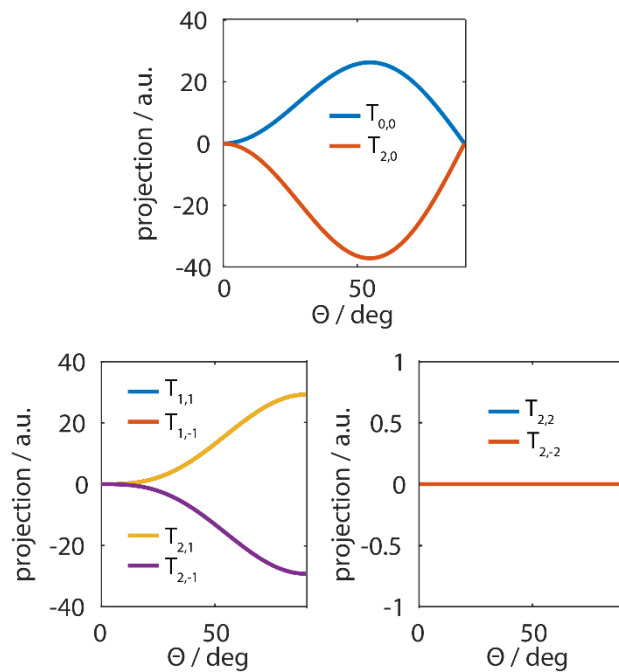

Figure S2: Projection of the magnitude of the third-order spin tensor resulting after FSLG-irradiation assuming one heteronuclear dipolar coupling. The simulation parameters for the powder orientations and the MAS to modulation frequency ratio are the same as shown in Figure 2 in the main text. The remaining auto-terms  $T_{0,0}$  and  $T_{2,0}$  are maximal around the magic angle and contribute directly to the residual linewidth. Here, a dipolar coupling of 40 kHz was assumed which corresponds to a direct C-H bond.

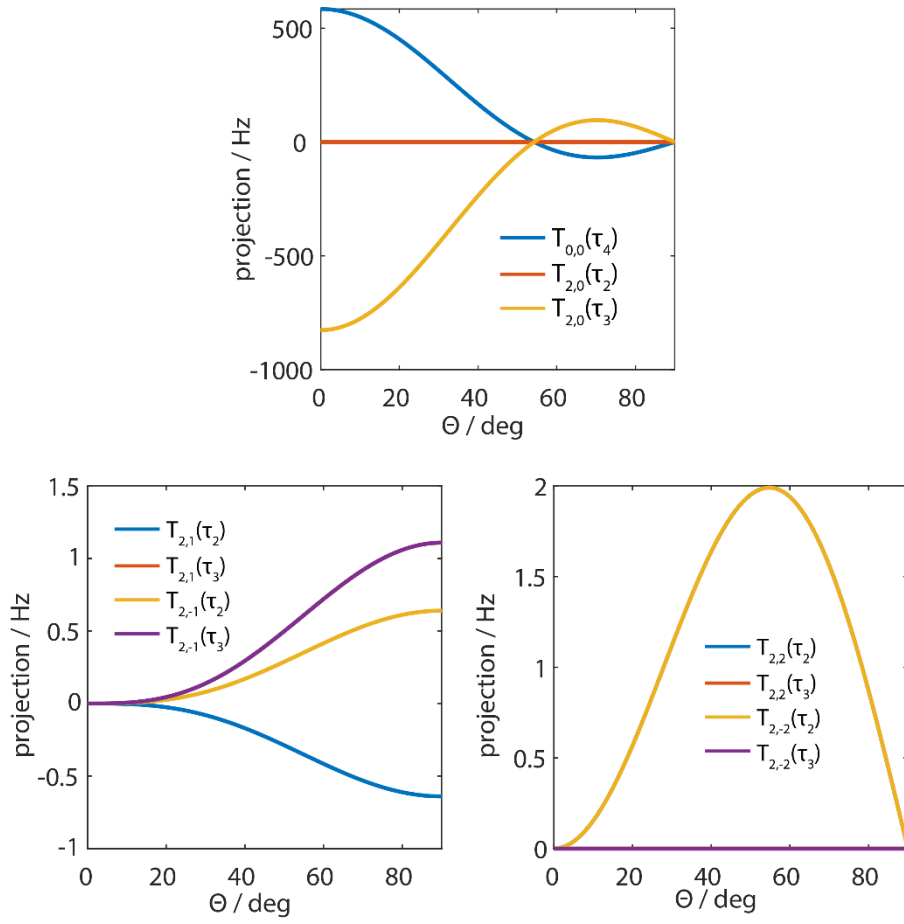

25 Figure S3: Projection of the magnitude of the three-spin tensor operators of the second-order effective Hamiltonian resulting from cross terms between homonuclear and heteronuclear dipole coupling. The effective Hamiltonian was calculated in analogy to the results shown in Figure 1 in the main text. The homonuclear coupling was set to  $\delta_{1,2}=10$  kHz and the heteronuclear coupling to  $\delta_{1,4}=40$  kHz. The ratio of the modulation frequency of the pulse sequence and the MAS frequency was assumed to be 10 in order to avoid higher-order contributions to the numerical simulations.

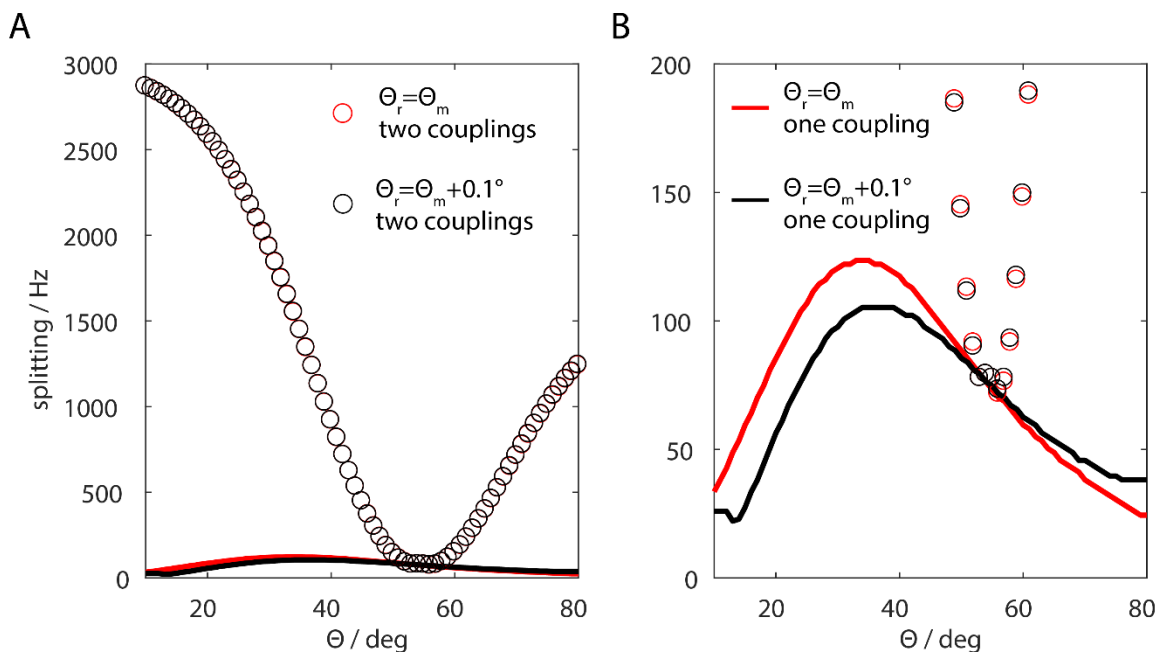

Figure S4: Simulations of FSLG sequence as a dependence of the effective-field angle and analysis of an error in the rotation angle. The splitting of the residual line width is presented without chemical-shift correction. The second-order cross-terms are minimized around the magic angle (circles) but the third-order terms resulting from a single dipolar coupling are never fully removed (solid line). It can be seen that an error in the rotation angle is not critical since the dipolar couplings are removed fairly well by the pulse sequence. A) Full scale of line widths as a function of the effective-field angle. B) Zoom on the residual line-width contributions up to 200 Hz. The MAS frequency was set to 6.25 kHz, the effective field to 125 kHz, the relative dipole orientation to 45°, the dipolar couplings to 40 kHz for the single coupling and to 10 kHz for the second coupling, and powder averaging was applied.

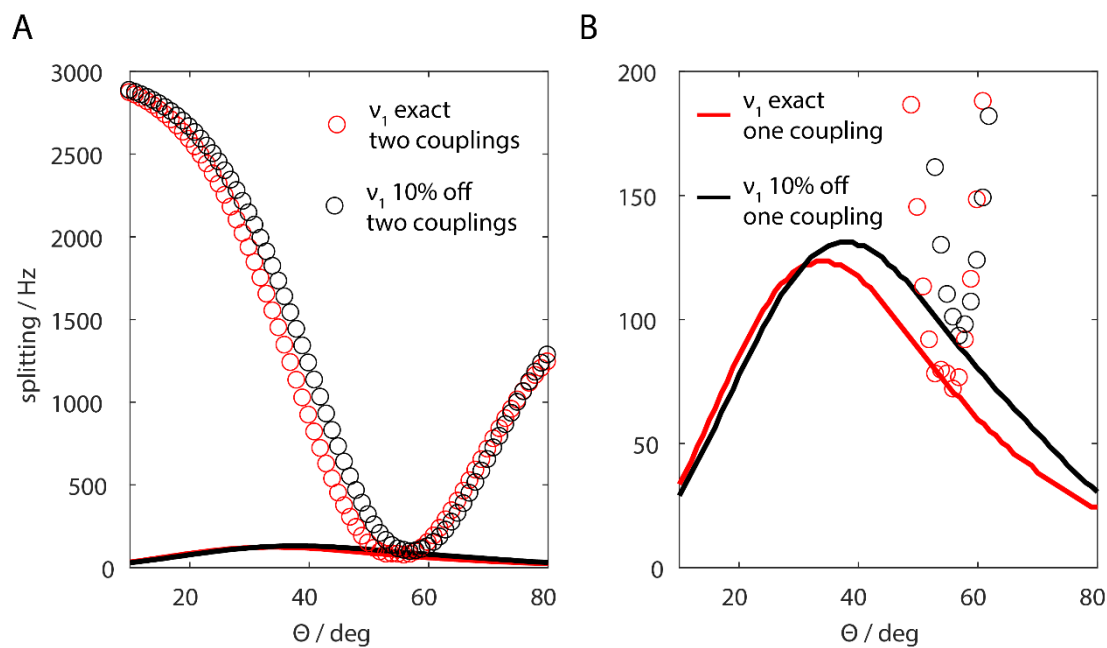

40 Figure S5: Simulations of FSLG sequence as a dependence of the effective-field angle and analysis of an error in the rf-field amplitude. This should simulate the influence of rf-field inhomogeneities. A) Full scale of line widths as a function of the effective-field angle. B) Zoom on the residual line-width contributions up to 200 Hz. The parameters are the same as in Figure S4.

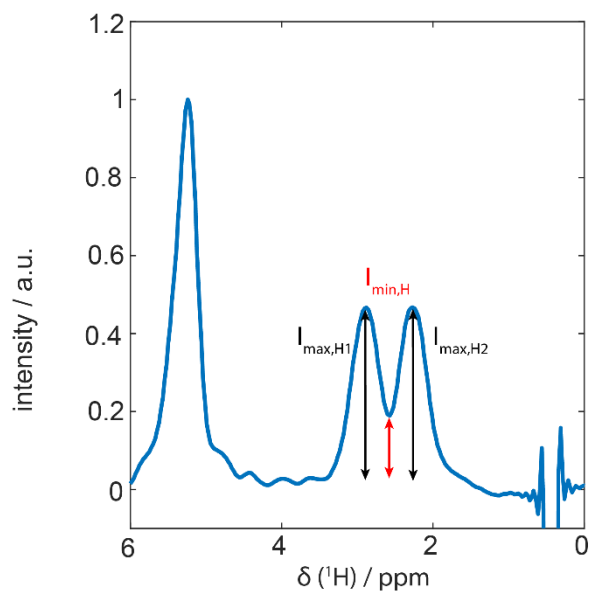

45 Figure S6: Graphical representation of the separation parameter  $\varepsilon$  of the  $\text{CH}_2$  group in glycine to characterize the decoupling efficiency. The separation parameter is defined as the ratio between the minimum height between the two lines and the average maximum line height of the two  $\text{CH}_2$  resonance  $\varepsilon = \frac{2I_{\text{min,H}}}{(I_{\text{max,H1}} + I_{\text{max,H2}})}$ .

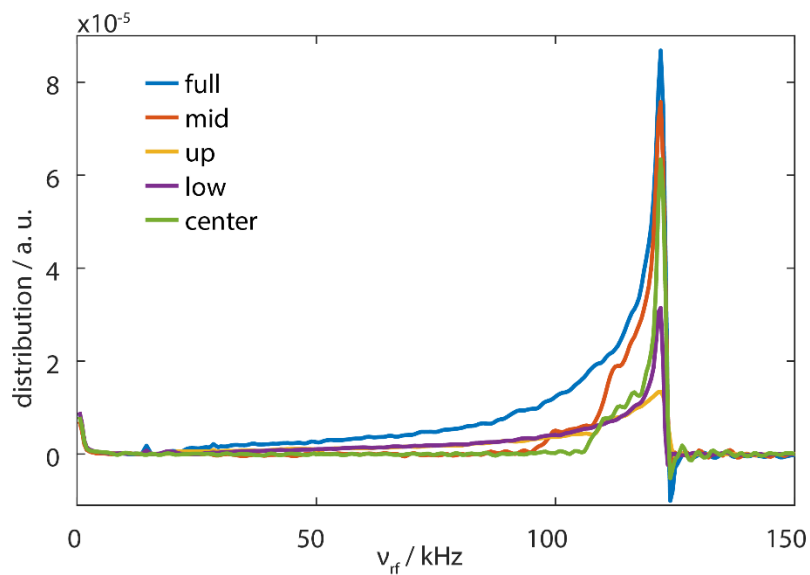

50 Figure S7: RF-field distribution measured on an adamantane sample for different parts of a 2.5 mm rotor in a standard Bruker probe. The sum of the lower, middle and upper third equals roughly to 1.1 times the signal of the full rotor. The applied  $B_1$  field was calibrated to 100 kHz using the full rotor and the first zero crossing of a  $\pi$  pulse. The highly restricted sample (*center*) shows the narrowest distribution but still spans a range of several kHz. The radial component of the rf-field inhomogeneity can be observed at integer multiples of the MAS frequency which was set to 14 kHz in the nutation experiments.



55 Table S1: CSA tensors for the spin system of an eight-spin homonuclear glycine in the PAS at 600 MHz.<sup>1</sup>

| CSA tensor           | shift (kHz) | $\delta_{\text{CSA}}$ (ppm) | $\eta_{\text{CSA}}$ | $\alpha_{\text{CSA}}$ (°) | $\beta_{\text{CSA}}$ (°) | $\gamma_{\text{CSA}}$ (°) |
|----------------------|-------------|-----------------------------|---------------------|---------------------------|--------------------------|---------------------------|
| $I_1$ (H $\alpha$ 1) | 1932        | 2100                        | 0.8013              | -54.76                    | 109.2                    | 96.18                     |
| $I_2$ (H $\alpha$ 2) | 2508        | -2974.8                     | 0.751               | -17.82                    | 103.4                    | 78.42                     |
| $I_3$ (HN)           | 4752        | 2085.6                      | 0.998               | -2.092                    | 88.39                    | 69.72                     |
| $I_4$ (HN)           | 4752        | 2085.6                      | 0.998               | -2.092                    | 88.39                    | 69.72                     |
| $I_5$ (HN)           | 4752        | 2085.6                      | 0.998               | -2.092                    | 88.39                    | 69.72                     |
| $I_6$ (H $\alpha$ 2) | 2508        | -2974.8                     | 0.751               | -17.82                    | 103.4                    | 78.42                     |
| $I_7$ (H $\alpha$ 2) | 2508        | -2974.8                     | 0.751               | -17.82                    | 103.4                    | 78.42                     |
| $I_8$ (H $\alpha$ 1) | 1932        | 2100                        | 0.8013              | -54.76                    | 109.2                    | 96.18                     |

Table S2: Dipolar and  $J$ -couplings for the spin system of an eight-spin homonuclear glycine in the PAS.<sup>1</sup>

| dipolar tensor | $J$ coup (Hz) | $\delta_{\text{dip}} 2\pi$ (kHz) | $\alpha_{\text{dip}}$ (°) | $\beta_{\text{dip}}$ (°) | $\gamma_{\text{dip}}$ (°) |
|----------------|---------------|----------------------------------|---------------------------|--------------------------|---------------------------|
| $I_1 I_2$      | 0             | -52245                           | 0                         | 70.7704                  | 120.471                   |
| $I_1 I_3$      | 0             | -13595                           | 134.371                   | 96.5903                  | 14.8764                   |
| $I_1 I_4$      | 0             | -13595                           | 134.371                   | 96.5903                  | 14.8764                   |
| $I_1 I_5$      | 0             | -11213                           | 134.371                   | 96.5903                  | 14.8764                   |
| $I_1 I_6$      | 0             | -2983.4                          | 0                         | 42.7559                  | 143.03                    |
| $I_1 I_7$      | 0             | -11683                           | 0                         | 135.41                   | 69.0396                   |
| $I_1 I_8$      | 0             | -4926.5                          | 0                         | 113.094                  | 234.532                   |
| $I_2 I_3$      | 0             | -13387                           | -105.815                  | 85.9751                  | 47.2049                   |
| $I_2 I_4$      | 0             | -13387                           | -105.815                  | 85.9751                  | 47.2049                   |
| $I_2 I_5$      | 0             | -11041                           | -105.815                  | 85.9751                  | 47.2049                   |
| $I_2 I_6$      | 0             | -9027.6                          | 0                         | 31.8856                  | 167.065                   |
| $I_2 I_7$      | 0             | -9027.6                          | 0                         | 148.114                  | 12.9347                   |
| $I_2 I_8$      | 0             | -2213.4                          | 0                         | 115.015                  | 255.244                   |
| $I_3 I_4$      | 0             | -30665                           | 0                         | 81.8395                  | 28.4886                   |
| $I_3 I_5$      | 0             | -24851                           | 0                         | 81.8395                  | 28.4886                   |
| $I_3 I_6$      | 0             | -6475.4                          | -124.44                   | 138.512                  | -96.44                    |
| $I_3 I_7$      | 0             | -2553.1                          | -53.6713                  | 118.981                  | 35.751                    |
| $I_3 I_8$      | 0             | -8747                            | 79.9454                   | 130.848                  | -83.2699                  |
| $I_4 I_5$      | 0             | -23441                           | 0                         | 81.8395                  | 28.4886                   |
| $I_4 I_6$      | 0             | -6475.4                          | -124.44                   | 138.512                  | -96.44                    |

<sup>1</sup> The values are taking from the reference: Frantsuzov, I., Vasa, S. K., Ernst, M., Brown, S. P., Zorin, V., Kentgens, A. P. M. and Hodgkinson, P.: Rationalising Heteronuclear Decoupling in Refocussing Applications of Solid-State NMR Spectroscopy, ChemPhysChem, 18(4), 394–405, doi:10.1002/cphc.201601003, 2017.

|          |   |         |          |         |          |
|----------|---|---------|----------|---------|----------|
| $I_4I_7$ | 0 | -2553.1 | -53.6713 | 118.981 | 35.751   |
| $I_4I_8$ | 0 | -8747   | 79.9454  | 130.848 | -83.2699 |
| $I_5I_6$ | 0 | -6475.4 | -124.44  | 138.512 | -96.44   |
| $I_5I_7$ | 0 | -2553.1 | -53.6713 | 118.981 | 35.751   |
| $I_5I_8$ | 0 | -8747   | 79.9454  | 130.848 | -83.2699 |
| $I_6I_7$ | 0 | -1152.5 | 0        | 148.771 | 0        |
| $I_6I_8$ | 0 | -899.91 | 0        | 134.988 | 275.494  |
| $I_7I_8$ | 0 | -1641.1 | 0        | 84.3594 | 239.803  |

### Analytical formulas for third-order auto terms

The third-order effective Hamiltonian is given by:

$$\tilde{\mathcal{H}}_{(3)}^{(0,0,0)} = \sum_{l=0}^2 \sum_{m=-l}^l X_{l,m} T_{l,m}$$

where the coefficients  $X_{l,m}$  are given by:

$$X_{0,0} = X_{1,0} = X_{1,1} = X_{1,-1} = 0$$

$$\begin{aligned} X_{2,0} = \frac{1}{\omega_r^2} & \left( -0.00598819 \omega_{1,2}^{(+2)} \omega_{1,2}^{(-1)} \omega_{1,2}^{(-1)} - 0.00598819 \omega_{1,2}^{(-2)} \omega_{1,2}^{(+1)} \omega_{1,2}^{(+1)} \right. \\ & - \left( 0.00506264 \omega_{1,2}^{(+2)} \omega_{1,2}^{(-1)} \omega_{1,2}^{(-1)} + 0.00506264 \omega_{1,2}^{(-2)} \omega_{1,2}^{(+1)} \omega_{1,2}^{(+1)} \right) \cos(2\theta) \\ & + \left( 0.00598819 \omega_{1,2}^{(+2)} \omega_{1,2}^{(-1)} \omega_{1,2}^{(-1)} + 0.00598819 \omega_{1,2}^{(-2)} \omega_{1,2}^{(+1)} \omega_{1,2}^{(+1)} \right) \cos(4\theta) \\ & \left. + \left( 0.00506264 \omega_{1,2}^{(+2)} \omega_{1,2}^{(-1)} \omega_{1,2}^{(-1)} + 0.00506264 \omega_{1,2}^{(-2)} \omega_{1,2}^{(+1)} \omega_{1,2}^{(+1)} \right) \cos(6\theta) \right) \end{aligned}$$

70

$$\begin{aligned} X_{2,1} = \frac{1}{\omega_r^2} & \left( \left( 0.0033459 \omega_{1,2}^{(+2)} \omega_{1,2}^{(-1)} \omega_{1,2}^{(-1)} + 0.0033459 \omega_{1,2}^{(-2)} \omega_{1,2}^{(+1)} \omega_{1,2}^{(+1)} \right) \sin(2\theta) \right. \\ & - \left( 0.00122364 \omega_{1,2}^{(+2)} \omega_{1,2}^{(-1)} \omega_{1,2}^{(-1)} + 0.00122364 \omega_{1,2}^{(-2)} \omega_{1,2}^{(+1)} \omega_{1,2}^{(+1)} \right) \sin(4\theta) \\ & \left. - \left( 0.00029954 \omega_{1,2}^{(+2)} \omega_{1,2}^{(-1)} \omega_{1,2}^{(-1)} + 0.00029954 \omega_{1,2}^{(-2)} \omega_{1,2}^{(+1)} \omega_{1,2}^{(+1)} \right) \sin(6\theta) \right) \end{aligned}$$

75

$$X_{2,-1} = -X_{2,1}$$

$$\begin{aligned} X_{2,2} = \frac{1}{\omega_r^2} & \left( 0.000963965 \omega_{1,2}^{(+2)} \omega_{1,2}^{(-1)} \omega_{1,2}^{(-1)} + 0.000963965 \omega_{1,2}^{(-2)} \omega_{1,2}^{(+1)} \omega_{1,2}^{(+1)} \right. \\ & - \left( 0.00317249 \omega_{1,2}^{(+2)} \omega_{1,2}^{(-1)} \omega_{1,2}^{(-1)} + 0.00317249 \omega_{1,2}^{(-2)} \omega_{1,2}^{(+1)} \omega_{1,2}^{(+1)} \right) \cos(2\theta) \\ & + \left( 0.000641444 \omega_{1,2}^{(+2)} \omega_{1,2}^{(-1)} \omega_{1,2}^{(-1)} + 0.000641444 \omega_{1,2}^{(-2)} \omega_{1,2}^{(+1)} \omega_{1,2}^{(+1)} \right) \cos(4\theta) \\ & \left. + \left( 0.00156709 \omega_{1,2}^{(+2)} \omega_{1,2}^{(-1)} \omega_{1,2}^{(-1)} + 0.00156709 \omega_{1,2}^{(-2)} \omega_{1,2}^{(+1)} \omega_{1,2}^{(+1)} \right) \cos(6\theta) \right) \end{aligned}$$

80

$$X_{2,-2} = X_{2,2}$$

After substitution of the Fourier coefficients of the dipolar couplings ( $\omega_{i,j}^{(n)}$ ), the expressions are obtained as a function of the Euler angles

85

$$\begin{aligned} X_{2,0} &= \frac{1}{\omega_r^2} u(\theta) \delta_{1,2}^3 \sin(\beta)^2 \sin(2\beta)^2 \\ X_{2,1} &= \frac{1}{\omega_r^2} v(\theta) \delta_{1,2}^3 \sin(\beta)^2 \sin(2\beta)^2 \end{aligned}$$

$$X_{2,2} = \frac{1}{\omega_{\text{r}}^2} w(\theta) \delta_{1,2}^3 \sin(\beta)^2 \sin(2\beta)^2$$
